# Supplementary material for: Determinants of frequency and longevity of hospital encounters' data use
Source: Springer Nature journal article supplement (doi:10.1186/1472-6947-10-15), 2010-03-16

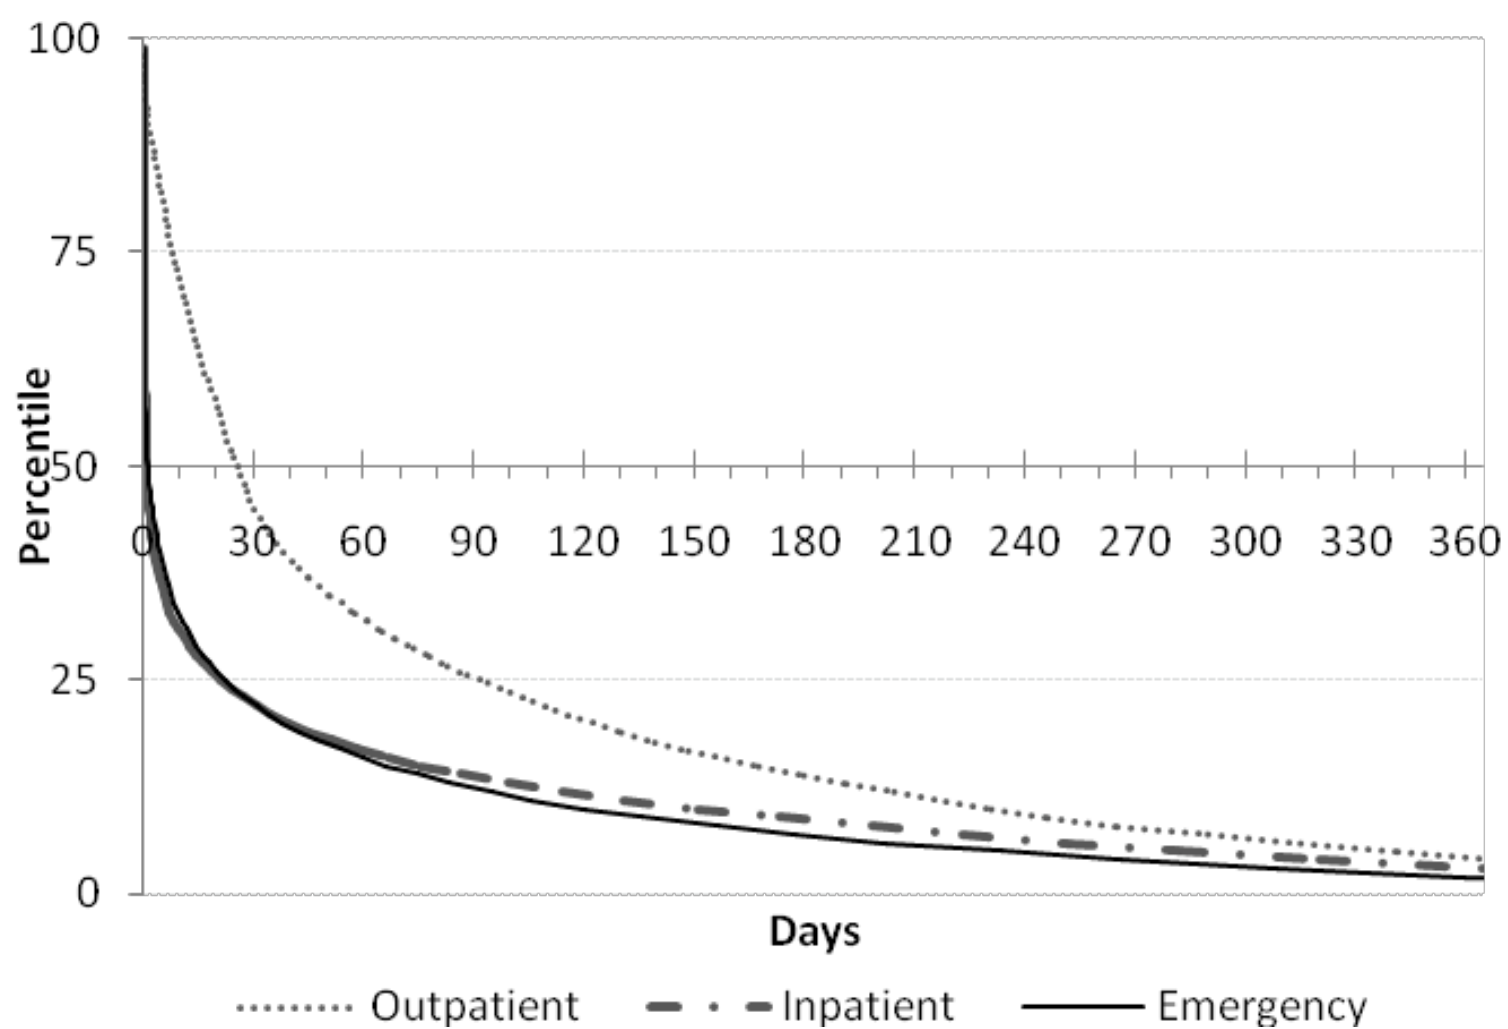

Supplement: 12911_2009_316_MOESM3_ESM.pdf [file 12911_2009_316_MOESM3_ESM.pdf]
