# Supplementary material for: Determinants of frequency and longevity of hospital encounters' data use
Source: Springer Nature journal article supplement (doi:10.1186/1472-6947-10-15), 2010-03-16
Supplement: 12911_2009_316_MOESM4_ESM.pdf [file 12911_2009_316_MOESM4_ESM.pdf]

## Last reports of Mr. John Smith

### Clinical pathology reports of the last **15 days**

[Biochemical results](#) ..... 3 hours ago

[Microbiologic report](#) . 12 days and 6 hours ago

Click [here](#) to see 32 previous reports

### Gastroenterology reports of the last **80 days**

[Upper endoscopy report](#) ..... 33 days ago

Click [here](#) to see 2 previous reports

### Pathology reports of the last **118 days**

[Citology](#) ..... 60 days ago

Click [here](#) to see 1 previous report
